# Supplementary material for: 短期講座 倒産企業の会計操作(2)裁量的発生高の分析
Source: Royal Society of Chemistry journal article supplement (doi:10.1039/c8cp07536k), 2004-05-01
Supplement: c8cp07536k1.pdf [file c8cp07536k1.pdf]

**Suplimentary Information for**  
**Revisiting the reaction of  $\text{CH}_3\text{O}^\bullet$  with  $\text{O}_2$  ( $^3\Sigma^-$ ):**  
**Crucial role of post-CCSD(T) corrections**

Subhasish Mallick, Amit Kumar, and Pradeep Kumar\*

*Department of Chemistry, MNIT Jaipur, Jaipur, 302017, India*

E-mail: pradeep.chy@mnit.ac.in

| Sl. No. | Contents                                                                                                                                                                                                                                                                       |
|---------|--------------------------------------------------------------------------------------------------------------------------------------------------------------------------------------------------------------------------------------------------------------------------------|
| 1       | <b>Table S1</b> :Comparison of frequencies in ( $\text{cm}^{-1}$ ) and geometrical parameters of relevant structures obtained in present work (CCSD(T)/cc-pVTZ) with available experimental value.                                                                             |
| 2       | <b>Table S2</b> :Optimized geometries in cartesian coordinates and all normal mode frequencies calculated at the CCSD(T)/cc-pVTZ level of theory.                                                                                                                              |
| 3       | <b>Table S3</b> :Harmonic and anharmonic frequencies of all relevant species in $\text{cm}^{-1}$ obtained at X3LYP/6-311G** level of theory                                                                                                                                    |
| 4       | <b>Table S4</b> :Comparison of rate coefficients in ( $\text{cm}^3 \text{s}^{-1}$ ) for the title reaction, obtained at Transition state theory ( $k^{har}_{TST/ZCT}$ and $k^{anhar}_{TST/ZCT}$ ) with experimental results ( $k_{EXPT}$ ) within temperature range 250-900 K. |
| 5       | <b>Table S5</b> : Absolute electronic energies calculated at the CCSD(T)/aug-cc-pVTZ, CCSD(T)/aug-cc-pVQZ and CCSD(T)/CBS levels of theory (in Hartree).                                                                                                                       |
| 6       | <b>Figure S1</b> :The optimised geometry of all the relevant structures obtained in present work at CCSD(T)/cc-pVTZ level of theory.                                                                                                                                           |

Table S1: Comparison of frequencies in ( $\text{cm}^{-1}$ ) and geometrical parameters of relevant structures, obtained in present work (CCSD(T)/cc-pVTZ) with available experimental value.

| Methods         | Species                       | Frequencies ( $\text{cm}^{-1}$ )                     | Bond length ( $\text{\AA}$ ) |           |           |           | Bond angle( $^\circ$ ) |             |             |
|-----------------|-------------------------------|------------------------------------------------------|------------------------------|-----------|-----------|-----------|------------------------|-------------|-------------|
|                 |                               |                                                      | $R_{C-H}$                    | $R_{C-O}$ | $R_{o=O}$ | $R_{C=O}$ | $A_{O-C-H}$            | $A_{H-C-H}$ | $A_{H-O-O}$ |
| Experimental    | $\text{CH}_3\text{O}^\bullet$ | 2840 , 914 , 1412 , 652 , 1047 , 2758                | 1.11                         | 1.40      |           |           | 111.3                  | 107.5       |             |
|                 | $\text{O}_2$                  | 1580                                                 |                              |           | 1.20      |           |                        |             |             |
|                 | $\text{CH}_2\text{O}$         | 2782, 2843, 1746, 1249, 1500, 1167                   | 1.11                         |           |           | 1.20      | 121.9                  | 116.1       |             |
|                 | $\text{HO}_2^\bullet$         | 3436, 1098, 1392                                     |                              |           | 1.33      |           |                        |             | 104.2       |
| CCSD(T)/cc-pVTZ | $\text{CH}_3\text{O}^\bullet$ | 767, 968, 1116, 1388, 1394<br>1524, 2943, 3019, 3061 | 1.09                         | 1.37      |           |           | 112.9                  | 106.9       |             |
|                 | $\text{O}_2$                  | 1583                                                 |                              |           | 1.21      |           |                        |             |             |
|                 | $\text{CH}_2\text{O}$         | 1192, 1274, 1543, 1780, 2929, 2995                   | 1.10                         |           |           | 1.20      | 121.9                  | 116.1       |             |
|                 | $\text{HO}_2^\bullet$         | 965, 1234, 3760                                      |                              |           | 1.40      |           |                        |             | 101.3       |

Table S2: Optimized geometries in cartesian coordinates and all normal mode frequencies calculated at the CCSD(T)/cc-pVTZ level of theory.

| Species            | Cartesian coordinate (Å) |             |             | Frequencies (cm <sup>-1</sup> ) |                                                                                                                                                                         |
|--------------------|--------------------------|-------------|-------------|---------------------------------|-------------------------------------------------------------------------------------------------------------------------------------------------------------------------|
| O <sub>2</sub>     | O                        | 0.00        | 0.00        | 0.00                            | 1583.7144                                                                                                                                                               |
|                    | O                        | 0.00        | 0.00        | 1.21220899                      |                                                                                                                                                                         |
| CH <sub>3</sub> O• | O                        | 0.00        | 0.00        | 0.00                            | 767.1706 ,968.7224 ,1116.0596<br>1388.9675, 1394.5491<br>3019.4236, 3061.8177<br>1524.64, 2943.3706                                                                     |
|                    | C                        | 0.00        | 0.00        | 1.3759293                       |                                                                                                                                                                         |
|                    | H                        | 1.06465899  | 0.00        | 1.66557275                      |                                                                                                                                                                         |
|                    | H                        | -0.44723026 | 0.90478626  | 1.80249964                      |                                                                                                                                                                         |
|                    | H                        | 0.44723026  | -0.90478626 | 1.80249964                      |                                                                                                                                                                         |
| RC                 | C                        | 0.00        | 0.00        | 0.00                            | 138.1883, 218.2083, 355.1952,<br>543.5466, 715.3618, 1035.2846<br>1174.4799, 1174.8368, 1292.6272<br>1432.0476, 1461.7779, 1516.5759<br>3033.7796, 3114.1488, 3139.2639 |
|                    | H                        | 0.00        | 0.00        | 1.09166949                      |                                                                                                                                                                         |
|                    | H                        | 1.02571485  | 0.00        | -0.3697448                      |                                                                                                                                                                         |
|                    | H                        | -0.52721049 | -0.88104732 | -0.3708733                      |                                                                                                                                                                         |
|                    | O                        | -0.52463025 | 1.19712883  | -0.53204361                     |                                                                                                                                                                         |
|                    | O                        | -1.98291766 | 1.33180643  | -0.08749799                     |                                                                                                                                                                         |
|                    | O                        | -2.38959811 | 0.38675369  | 0.62840744                      |                                                                                                                                                                         |
| TS                 | O                        | 0.00        | 0.00        | 0.00                            | 190.9349,252.2367,491.4389<br>582.6105,688.9518,1151.2018<br>1232.365,1269.7968,1358.1544<br>-1444.0995, 1491.155, 1540.7782<br>1653.3144, 2958.4909, 3038.2652         |
|                    | O                        | 0.00        | 0.00        | 1.22611051                      |                                                                                                                                                                         |
|                    | H                        | 1.39566772  | 0.00        | 1.4667326                       |                                                                                                                                                                         |
|                    | C                        | 2.45670082  | 0.00        | 0.82181902                      |                                                                                                                                                                         |
|                    | H                        | 2.91495565  | 0.92733864  | 1.19325261                      |                                                                                                                                                                         |
|                    | H                        | 2.91495565  | -0.92733864 | 1.19325261                      |                                                                                                                                                                         |
|                    | O                        | 2.00588831  | 0.00        | -0.39017308                     |                                                                                                                                                                         |
| PC                 | O                        | 1.513417    | 0.732443    | 0.000563                        | 65.3088, 124.2180, 182.2915<br>198.8997 , 238.4886, 628.7308<br>1194.9596, 1235.7616, 1296.4796<br>1552.3618, 1576.6435. 1804.4672<br>3003.9705, 3102.1267, 3553.6631   |
|                    | O                        | 1.474768    | -0.592465   | -0.000612                       |                                                                                                                                                                         |
|                    | H                        | 0.51594     | -0.787653   | 0.000399                        |                                                                                                                                                                         |
|                    | C                        | -1.713399   | 0.47981     | -0.000347                       |                                                                                                                                                                         |
|                    | H                        | -2.793936   | 0.673639    | 0.000157                        |                                                                                                                                                                         |
|                    | H                        | -1.037551   | 1.341939    | -0.001876                       |                                                                                                                                                                         |
|                    | O                        | -1.288693   | -0.653326   | 0.000473                        |                                                                                                                                                                         |
| CH <sub>2</sub> O  | C                        | 0.00        | 0.00        | 0.00                            | 1192.1841, 1274.8661, 1543.1947<br>1780.7596, 2929.2275, 2995.8513                                                                                                      |
|                    | H                        | 0.00        | 0.00        | 1.10327959                      |                                                                                                                                                                         |
|                    | H                        | 0.99005364  | 0.00        | -0.48684663                     |                                                                                                                                                                         |
|                    | O                        | -1.02680409 | 0.00        | -0.63931474                     |                                                                                                                                                                         |
| HO <sub>2</sub> •  | O                        | 0.055939    | -0.650222   | 0.00                            | 965.8979, 1234.936, 3760.9185                                                                                                                                           |
|                    | H                        | -0.895022   | -0.837408   | 0.00                            |                                                                                                                                                                         |
|                    | O                        | 0.055939    | 0.754898    | 0.00                            |                                                                                                                                                                         |

Table S3: Harmonic and anharmonic frequencies of all relevant species in  $\text{cm}^{-1}$  obtained at X3LYP/6-311G\*\* level of theory

| compound           | harmonic  | anharmonic | corr.-anharmonic |
|--------------------|-----------|------------|------------------|
| CH <sub>3</sub> O• | 702.718   | 702.718*   | 767.1706         |
|                    | 965.851   | 965.851*   | 968.7224         |
|                    | 1112.18   | 645.899    | 649.7786         |
|                    | 1373.61   | 1279.714   | 1295.0715        |
|                    | 1363.568  | 1339.923   | 1370.9041        |
|                    | 1519.384  | 1451.107   | 1456.363         |
|                    | 2896.878  | 2756.398   | 2802.8906        |
|                    | 2962.212  | 2752.761   | 2809.9726        |
|                    | 3003.197  | 2809.855   | 2868.4757        |
| O <sub>2</sub>     | 1580      | -          | -                |
| RC                 | 101.612   | 242.177    | 278.7533         |
|                    | 207.181   | 313.874    | 324.9013         |
|                    | 314.663   | 315.129    | 355.6612         |
|                    | 410.889   | 327.318    | 459.9756         |
|                    | 665.64    | 635.496    | 685.2178         |
|                    | 1019.271  | 1004.597   | 1020.6106        |
|                    | 1159.961  | 1137.55    | 1152.0689        |
|                    | 1169.879  | 1151.749   | 1156.7068        |
|                    | 1359.485  | 1354.493   | 1287.6352        |
|                    | 1429.151  | 1410.336   | 1413.2326        |
|                    | 1437.93   | 1416.036   | 1439.8839        |
|                    | 1510.904  | 1420.734   | 1426.4059        |
|                    | 2998.028  | 2781.611   | 2817.3626        |
| 3066.263           | 2904.096  | 2951.9818  |                  |
| 3091.801           | 2933.215  | 2980.6779  |                  |
| TS                 | -1173.319 | -1433.651  | -1704.4315       |
|                    | 199.27    | 129.166    | 120.8309         |
|                    | 240.774   | 181.424    | 192.8867         |
|                    | 486.469   | 397.14     | 402.1099         |
|                    | 555.716   | 443.579    | 470.4735         |
|                    | 683.885   | 640.757    | 645.8238         |
|                    | 1107.13   | 1049.239   | 1093.3108        |
|                    | 1232.822  | 1231.861   | 1231.404         |
|                    | 1252.945  | 1223.565   | 1240.4168        |
|                    | 1361.968  | 1282.08    | 1278.2664        |
|                    | 1510.081  | 1490.117   | 1471.191         |
|                    | 1550.384  | 1507.78    | 1498.1742        |
|                    | 1652.535  | 1700.608   | 1701.3874        |
| 2895.806           | 2719.134  | 2781.8189  |                  |
| 2967.009           | 2800.401  | 2871.6572  |                  |

| compound          | harmonic | anharmonic | corr.-anharmonic |
|-------------------|----------|------------|------------------|
| PC                | 79.745   | 73.942     | 59.5058          |
|                   | 136.019  | 115.8      | 103.999          |
|                   | 193.811  | 180.166    | 168.6465         |
|                   | 205.803  | 185.327    | 178.4237         |
|                   | 256.031  | 233.149    | 215.606          |
|                   | 642.701  | 573.598    | 559.6278         |
|                   | 1191.624 | 1165.894   | 1169.2296        |
|                   | 1222.01  | 1197.521   | 1211.2726        |
|                   | 1274.415 | 1246.678   | 1268.7426        |
|                   | 1524.339 | 1495.915   | 1523.9378        |
|                   | 1544.927 | 1491.591   | 1523.3075        |
|                   | 1787.739 | 1763.484   | 1780.2122        |
|                   | 2929.236 | 2763.923   | 2838.6575        |
| 3028.578          | 2843.406 | 2916.9547  |                  |
| 3382.128          | 3187.823 | 3359.3281  |                  |
| CH <sub>2</sub> O | 1204.585 | 1184.78    | 1172.3791        |
|                   | 1272.121 | 1251.657   | 1254.4021        |
|                   | 1540.897 | 1508.675   | 1510.9727        |
|                   | 1832.391 | 1806.635   | 1755.0036        |
|                   | 2876.318 | 2673.464   | 2726.3735        |
|                   | 2926.962 | 2713.177   | 2782.0663        |
| HO <sub>2</sub>   | 1169.575 | 1145.901   | 942.2239         |
|                   | 1432.004 | 1396.398   | 1199.33          |
|                   | 3622.401 | 3401.326   | 3539.8435        |

\*The VPT2 method is unable to calculate these anharmonic frequencies at X3LYP/6-311G\*\* level of theory, so we assume these frequencies to be harmonic

Table S4: Comparison of rate coefficients in (  $\text{cm}^3 \text{s}^{-1}$  ) for the title reaction, obtained at Transition state theory ( $k_{TST/ZCT}^{har}$  and  $k_{TST/ZCT}^{anhar}$  ) with experimental results ( $k_{EXPT}$ ) within temperature range 250-900 K.

| T(K) | $k_{TST/ZCT}^{har}$     | $k_{TST/ZCT}^{anhar}$   | $k_{EXPT}$                                                                                                                   |
|------|-------------------------|-------------------------|------------------------------------------------------------------------------------------------------------------------------|
| 250  | $2.22 \times 10^{-15}$  | $3.09 \times 10^{-15}$  | $9.4 \times 10^{-16}^a$                                                                                                      |
| 265  | $2.39 \times 10^{-15}$  | $3.35 \times 10^{-15}$  | $1.06 \times 10^{-15}^a$                                                                                                     |
| 278  | $2.55 \times 10^{-15}$  | $3.60 \times 10^{-15}$  | $1.34 \times 10^{-15}^a$                                                                                                     |
| 298  | $2.82 \times 10^{-15}$  | $4.03 \times 10^{-15}$  | $1.92 \times 10^{-15}^{b,c}$                                                                                                 |
| 300  | $2.85 \times 10^{-15}$  | $4.07 \times 10^{-15}$  | $1.96 \times 10^{-15}^{b,c}$                                                                                                 |
| 310  | $2.99 \times 10^{-15}$  | $4.31 \times 10^{-15}$  | $1.76 \times 10^{-15}(316\text{K})^a$                                                                                        |
| 330  | $3.30 \times 10^{-15}$  | $4.80 \times 10^{-15}$  | $1.79 \times 10^{-15}(333\text{K})^a$                                                                                        |
| 350  | $3.65 \times 10^{-15}$  | $5.35 \times 10^{-15}$  | $3.16 \times 10^{-15}^{b,c}, 2.60 \times 10^{-15}^d$                                                                         |
| 375  | $4.10 \times 10^{-15}$  | $6.06 \times 10^{-15}$  | $3.82 \times 10^{-15}^{b,c}, 3.44 \times 10^{-15}^d$                                                                         |
| 400  | $4.63 \times 10^{-15}$  | $6.95 \times 10^{-15}$  | $4.52 \times 10^{-15}^{b,c}, 4.3 \times 10^{-15}^d, 3.92 \times 10^{-15}^e, 3.45 \times 10^{-15}^f$                          |
| 425  | $5.19 \times 10^{-15}$  | $7.87 \times 10^{-15}$  | $5.23 \times 10^{-15}^{b,c}, 5.26 \times 10^{-15}^d, 5.29 \times 10^{-15}^e, 4.63 \times 10^{-15}^f, 4.80 \times 10^{-15}^g$ |
| 450  | $5.79 \times 10^{-15}$  | $8.89 \times 10^{-15}$  | $5.96 \times 10^{-15}^b, 6.27 \times 10^{-15}^d, 5.69 \times 10^{-15}^g$                                                     |
| 475  | $6.46 \times 10^{-15}$  | $9.99 \times 10^{-15}$  | $6.64 \times 10^{-15}^g$                                                                                                     |
| 500  | $7.17 \times 10^{-15}$  | $11.20 \times 10^{-15}$ | $7.62 \times 10^{-15}^g$                                                                                                     |
| 550  | $8.77 \times 10^{-15}$  | $13.92 \times 10^{-15}$ | $9.66 \times 10^{-15}^g$                                                                                                     |
| 600  | $10.60 \times 10^{-15}$ | $17.07 \times 10^{-15}$ | $11.80 \times 10^{-15}^g$                                                                                                    |
| 650  | $12.70 \times 10^{-15}$ | $20.70 \times 10^{-15}$ |                                                                                                                              |
| 700  | $1.50 \times 10^{-14}$  | $2.48 \times 10^{-14}$  | $1.61 \times 10^{-14}^h$                                                                                                     |
| 725  | $1.63 \times 10^{-14}$  | $2.71 \times 10^{-14}$  | $1.72 \times 10^{-14}^h$                                                                                                     |
| 750  | $1.77 \times 10^{-14}$  | $2.95 \times 10^{-14}$  | $1.82 \times 10^{-14}^h$                                                                                                     |
| 775  | $1.91 \times 10^{-14}$  | $3.20 \times 10^{-14}$  | $1.93 \times 10^{-14}^h$                                                                                                     |
| 800  | $2.07 \times 10^{-14}$  | $3.47 \times 10^{-14}$  | $2.03 \times 10^{-14}^h$                                                                                                     |
| 825  | $2.23 \times 10^{-14}$  | $3.75 \times 10^{-14}$  | $2.14 \times 10^{-14}^h$                                                                                                     |
| 850  | $2.40 \times 10^{-14}$  | $4.05 \times 10^{-14}$  | $2.24 \times 10^{-14}^h$                                                                                                     |
| 875  | $2.58 \times 10^{-14}$  | $4.37 \times 10^{-14}$  | $2.34 \times 10^{-14}^h$                                                                                                     |
| 900  | $2.76 \times 10^{-14}$  | $4.70 \times 10^{-14}$  | $2.44 \times 10^{-14}^h$                                                                                                     |

<sup>a</sup> Chai et al., <sup>b</sup> Lorenz et.al , <sup>c</sup> Zellener et.al, <sup>d</sup> Cox et.al, <sup>e</sup> Batt et.al, <sup>f</sup> Barker et.al, <sup>g</sup> Gutman et.al <sup>h</sup> Zalonsko et.al

Table S5: Absolute electronic energies calculated at the CCSD(T)/aug-cc-pVTZ, CCSD(T)/aug-cc-pVQZ and CCSD(T)/CBS levels of theory (in Hartree)

| Compounds          | CCSD(T)/aug-cc-pVTZ | CCSD(T)/aug-cc-pVQZ | CCSD(T)/CBS     |
|--------------------|---------------------|---------------------|-----------------|
| RC                 | -265.0242914        | -265.0912339        | -265.1330532339 |
| TS                 | -265.0091164        | -265.0761061        | -265.1177769951 |
| PC                 | -265.0848009        | -265.1526196        | -265.1944317268 |
| CH <sub>2</sub> O  | -114.3429251        | -114.3723672        | -114.3907603106 |
| HO <sub>2</sub> •  | -150.7239229        | -150.76201          | -150.7857377741 |
| O <sub>2</sub>     | -150.1410187        | -150.1786595        | -150.2018360593 |
| CH <sub>3</sub> O• | -114.8851034        | -114.913952         | -114.9320006734 |



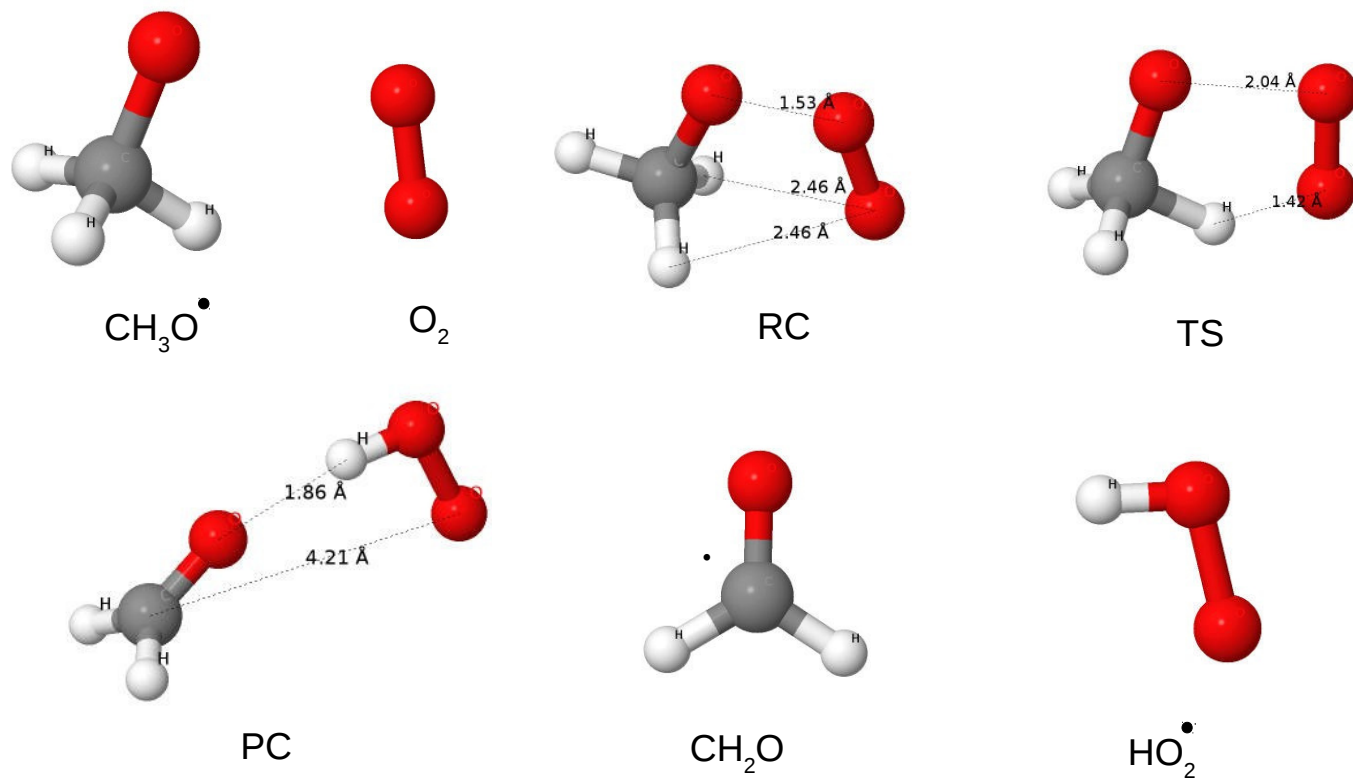

Figure S1: The optimized geometry of all the relevant structures obtained in present work at CCSD(T)/cc-pVTZ level of theory.
